# Supplementary material for: Crown-linked dipyridylamino-triazine ligands and their spin-crossover iron(ii) derivatives: magnetism, photomagnetism and cooperativity
Source: Royal Society of Chemistry journal article supplement (doi:10.1039/c3dt51839f), 2013-01-01
Supplement: c3dt51839f.pdf [file c3dt51839f.pdf]

## Crown-linked dipyridylamine-triazine ligands and their spin-crossover iron(II) derivatives: magnetism, photomagnetism and cooperativity.

Hayley S. Scott,<sup>a</sup> Tamsyn M. Ross,<sup>a</sup> Nicholas F. Chilton,<sup>a,b</sup> Ian A. Gass,<sup>a</sup> Boujemaa Moubaraki,<sup>a</sup> Guillaume Chastanet,<sup>c</sup> Nicolas Paradis,<sup>c</sup> Jean-François Létard,<sup>c</sup> Kuduva R. Vignesh,<sup>d</sup> Gopalan Rajaraman,<sup>d</sup> Stuart R. Batten,<sup>a</sup> and Keith S. Murray<sup>a\*</sup>

### ESI-Supporting Information

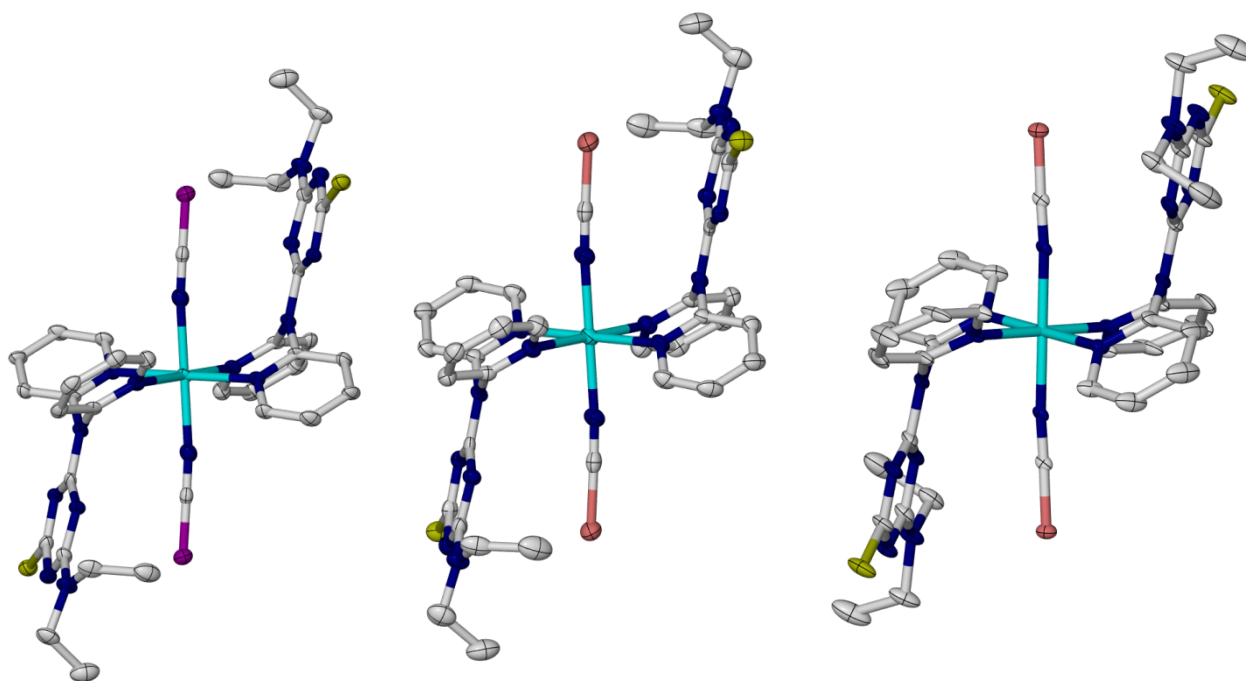

**Fig. S1** Structure of the  $L^1$  family of complexes **1-3**, showing the orientation of the diethylamine portion of  $L^1$ . Complexes **1** (left) and **2** (middle) 50% ellipsoids, complex **3** (right) 20% ellipsoids. H atoms omitted for clarity. Nitrogen, dark blue; X (X = S(**1**), Se(**2**), BH<sub>3</sub>(**3**)), purple; chlorine, green; Fe<sup>II</sup>, turquoise.

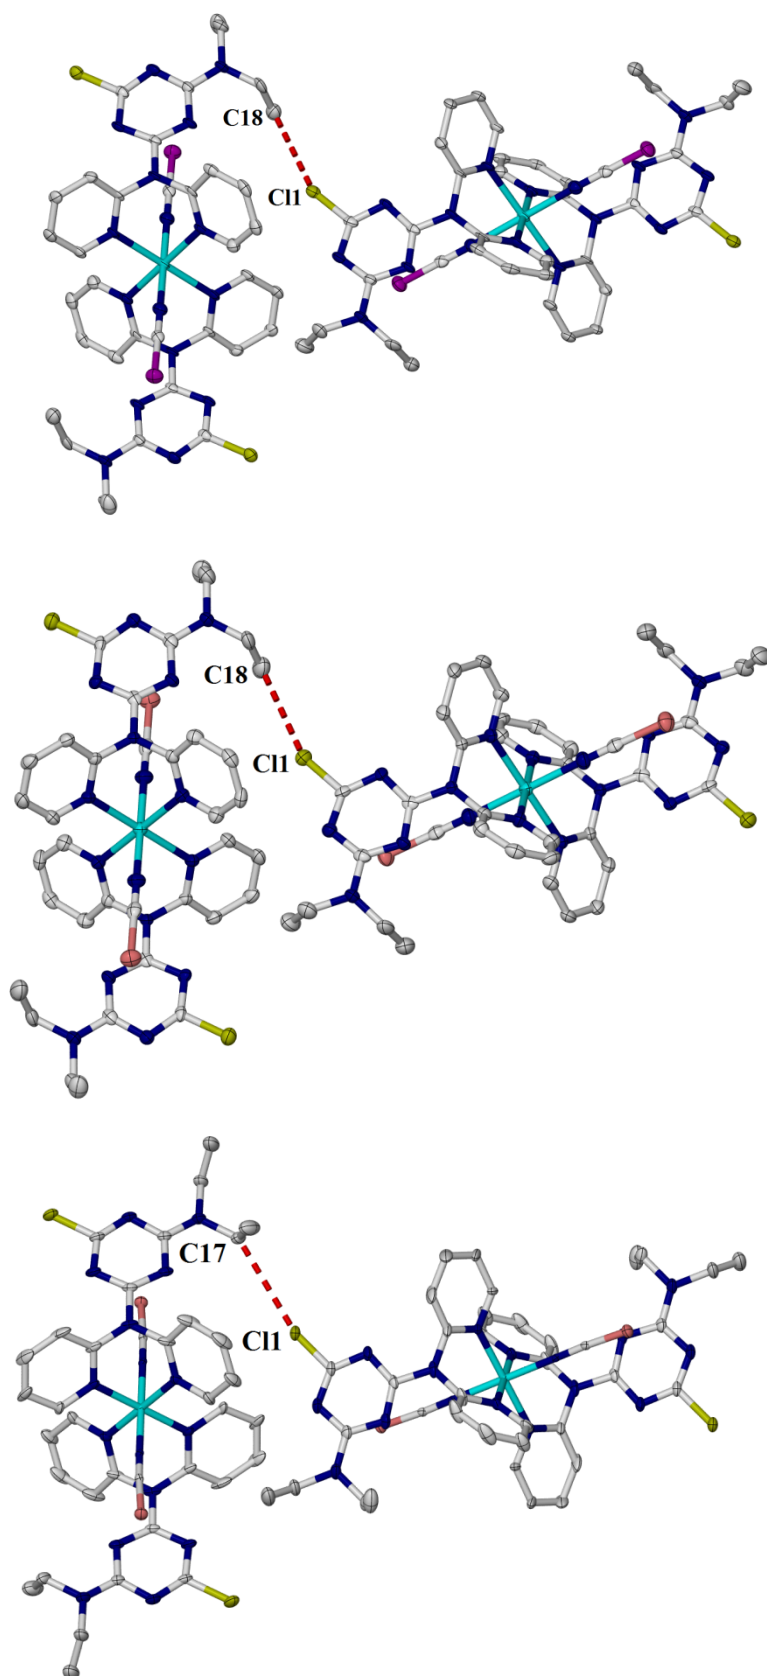

**Fig. S2** Structure of the  $L^1$  family of complexes **1**(top), **2**(middle) and **3**(bottom) showing the C-H...Cl contacts as a dashed red line. Complexes **1** and **2** 50% ellipsoids, complex **3** 20% ellipsoids. H atoms omitted for clarity. Nitrogen, dark blue; X (X = S(**1**), Se(**2**), BH<sub>3</sub>(**3**)), purple; chlorine, green; Fe<sup>II</sup>, turquoise.

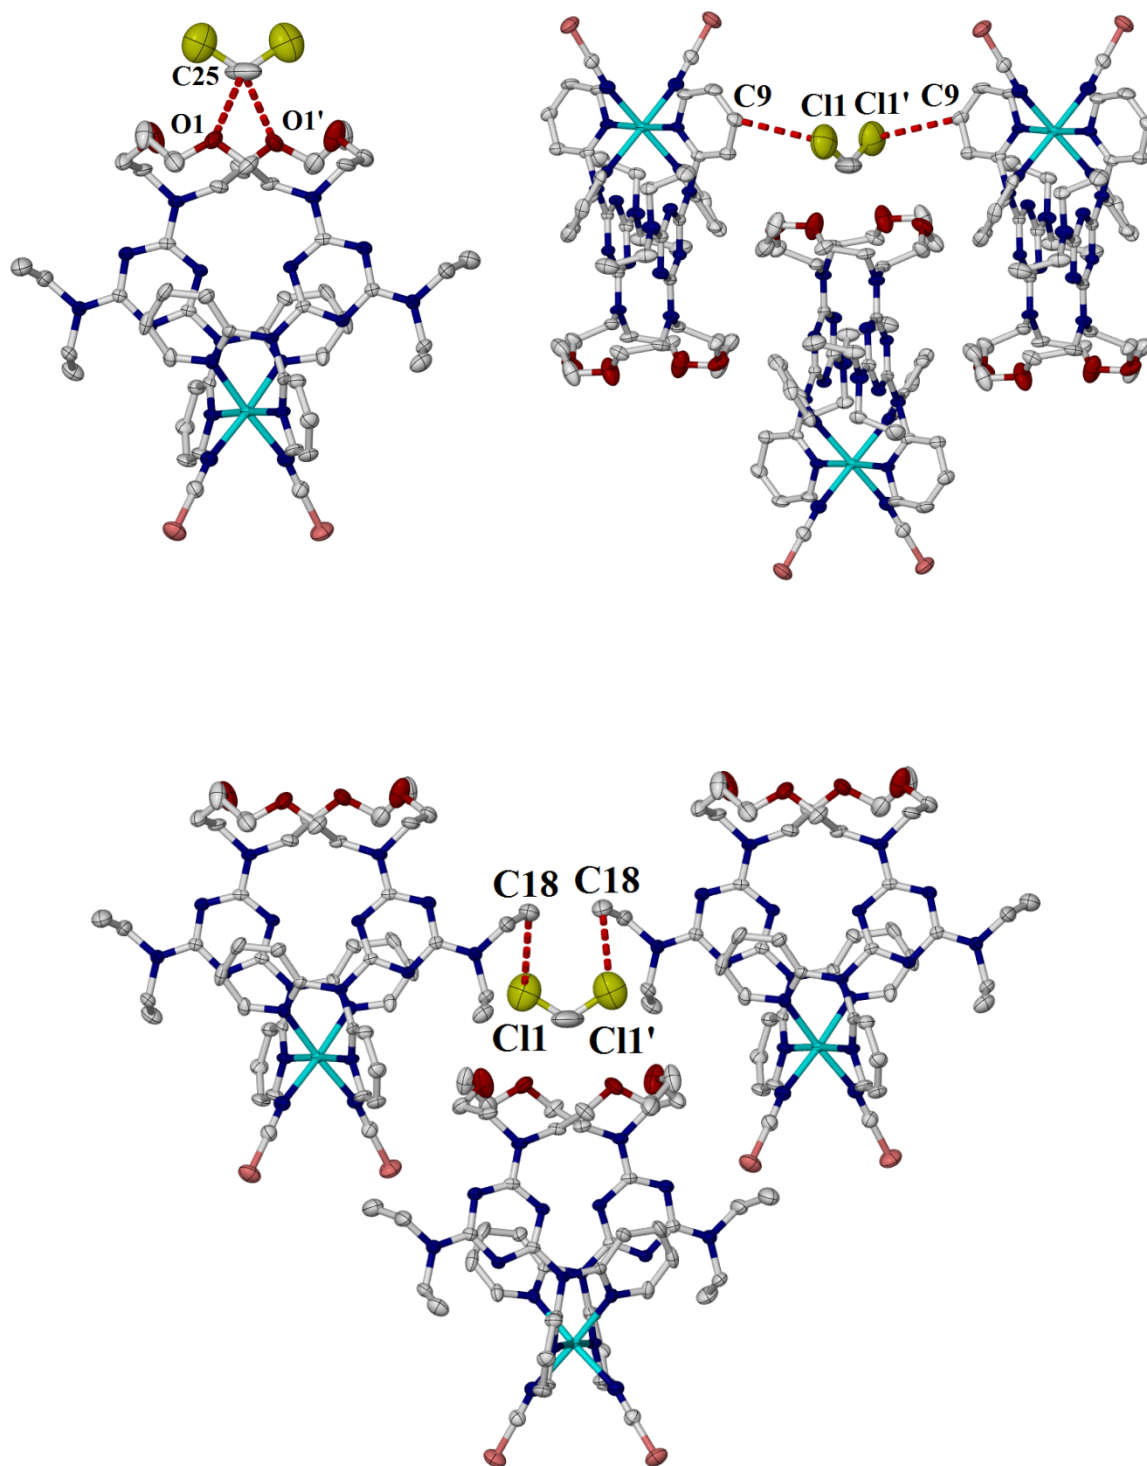

**Fig. S3** Structure of **6** showing C-H...O (top left) and C-H...Cl (top right and bottom) contacts as a dashed red line. Complexes **6** shown with 50% ellipsoids. H atoms omitted for clarity. Nitrogen, dark blue; boron, pink; chlorine, green; Fe<sup>II</sup>, turquoise.

**Table S1.** Intermolecular interactions lengths (Å) and angles (°) for complexes **1-3** and **6**.

| Complex  | <i>D-H...A</i> | <i>D-H</i> | <i>H...A</i> | <i>D...A</i> | <i>D-H...A</i> |
|----------|----------------|------------|--------------|--------------|----------------|
| <b>1</b> | C18-H18B...C11 | 0.980      | 2.814        | 3.415        | 120.25         |
| <b>2</b> | C18-H18A...C11 | 0.980      | 2.782        | 3.401        | 121.76         |
| <b>3</b> | C17-H17A...C11 | 0.990      | 2.981        | 3.689        | 129.38         |
| <b>6</b> | C25-H25B...O1  | 0.990      | 2.603        | 3.425        | 140.51         |
| <b>6</b> | C9-H9...C11    | 0.950      | 2.832        | 3.690        | 150.70         |
| <b>6</b> | C18-H18A...C11 | 0.980      | 2.835        | 3.661        | 142.51         |

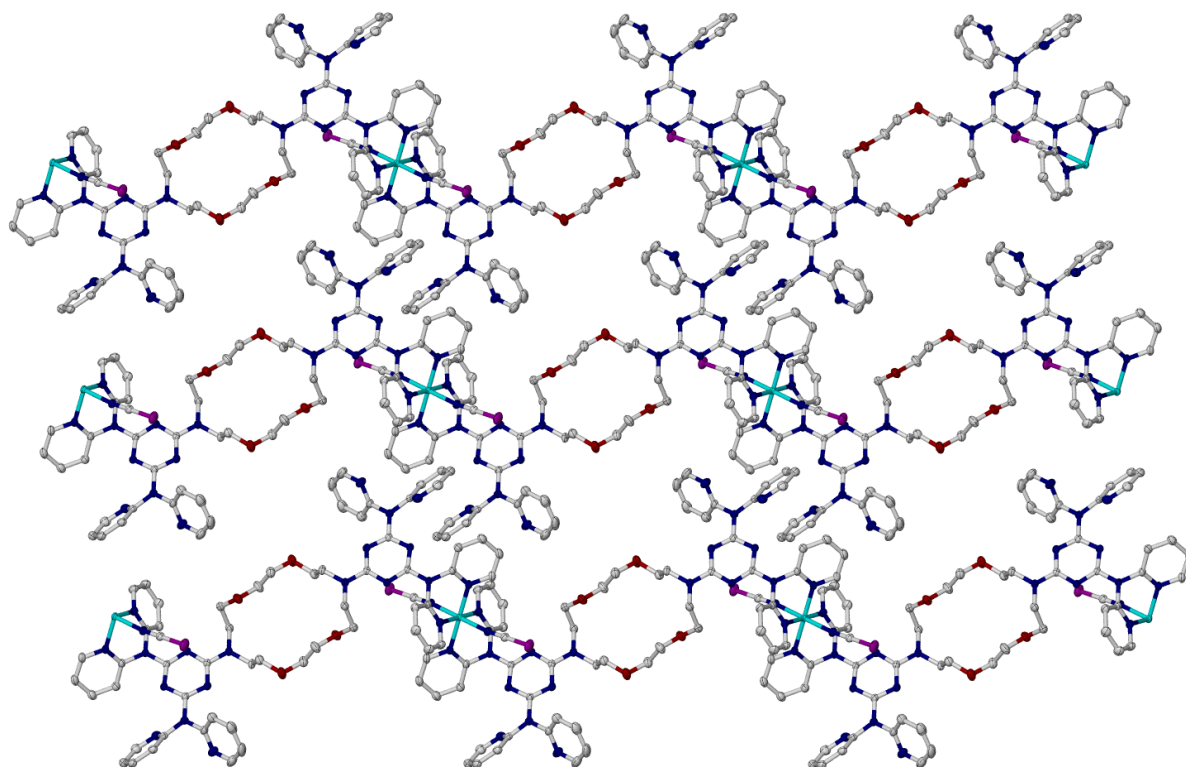

**Fig. S4** Packing of **7** (isotstructural to **8**).

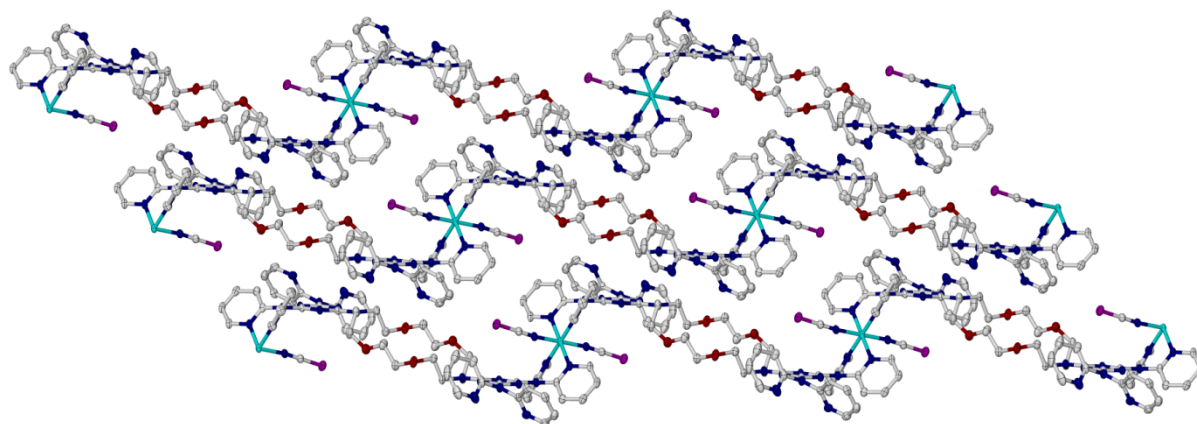

**Fig. S5** Packing of **7** (isostructural to **8**).

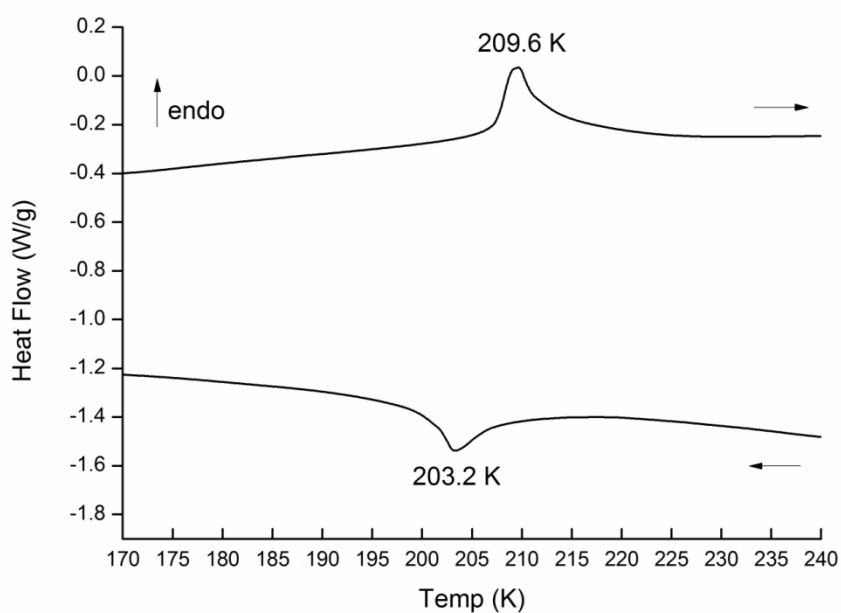

**Fig. S6** The differential scanning calorimetric measurement for a single heating and cooling cycle of **3** between 170 K and 240 K. The arrows indicate the cycle direction with the endothermic peaks pointing upwards as indicated.

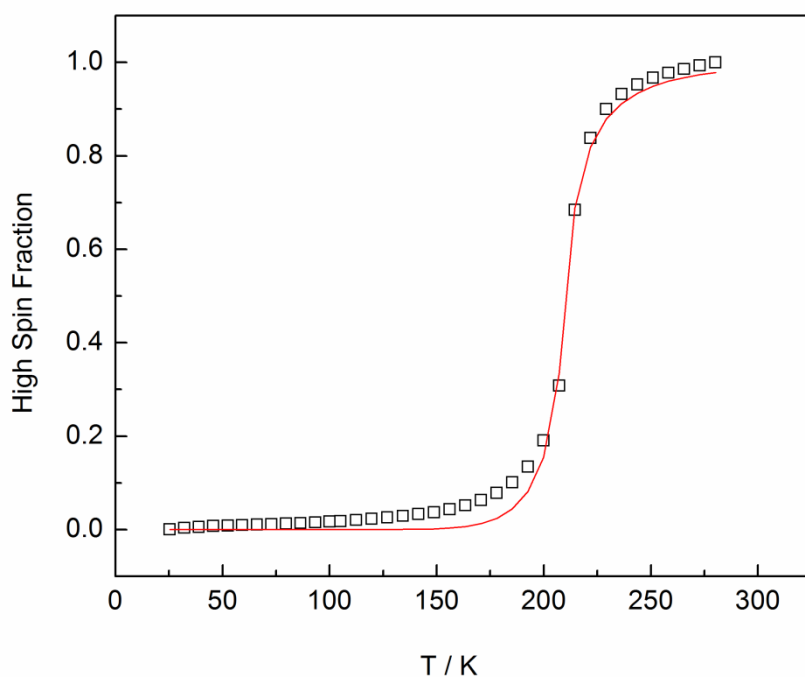

**Fig. S7** Plot of high-spin fraction, vs. temperature for complex **3**, where the red line is the best fit to the Slichter-Drickamer mean-field model (eqn. (1) in script) and the  $\Delta H$  and  $\Delta S$  and  $\Gamma$  values given in the script. The LS  $\chi_M(\text{TIP}; 2^{\text{nd}}$  order Zeeman) contribution (see Fig. 6) has not been included.

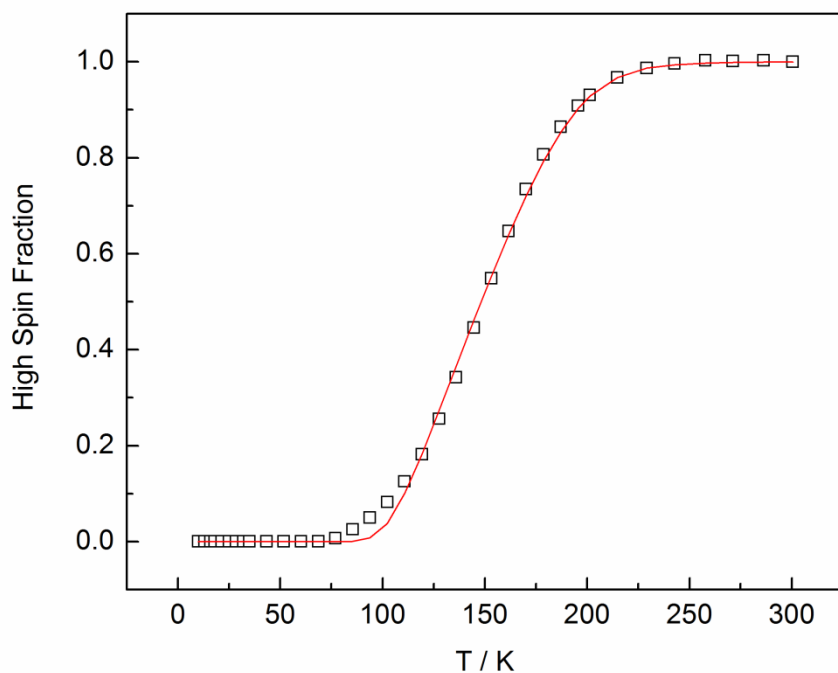

**Fig. S8** Plot of high-spin fraction, vs. temperature for complex **6**, where the red line is the best fit to the Slichter-Drickamer mean-field model (eqn. (1) in script) and the  $\Delta H$  and  $\Delta S$  and  $\Gamma$  values given in the script. The LS  $\chi_M(\text{TIP}; 2^{\text{nd}}$  order Zeeman) contribution (see Fig. 8) has not been included.

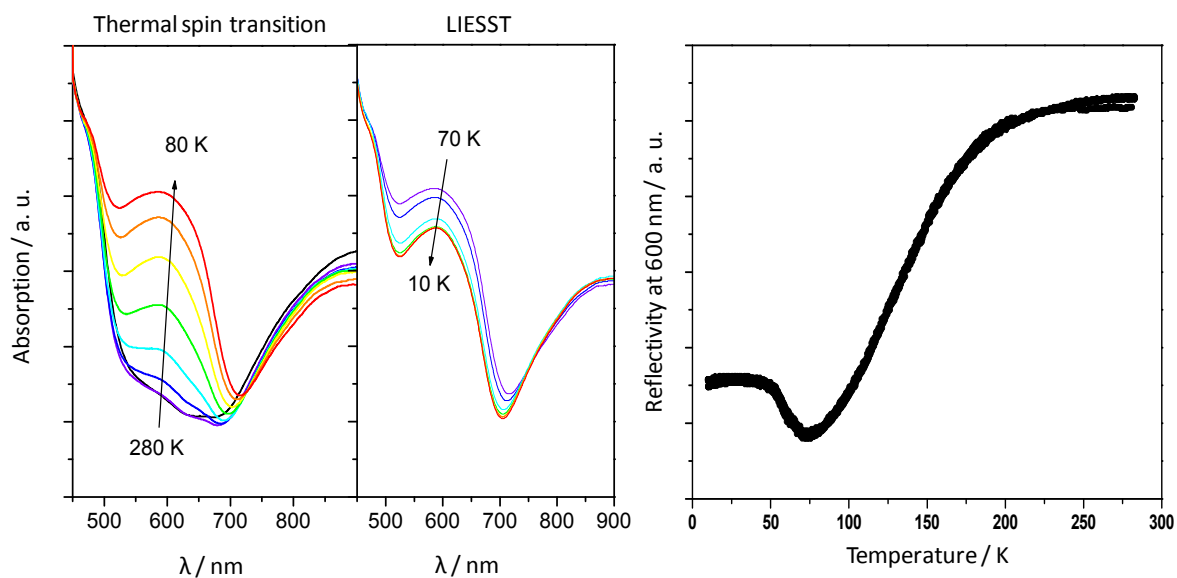

**Fig. S9** Thermal dependence of the absorption spectra under light irradiation (left) and intensity of the reflectivity signal at 600 nm (right) for cis-[Fe<sup>II</sup>(L<sup>2</sup>)(NCSe)<sub>2</sub>], **5**.

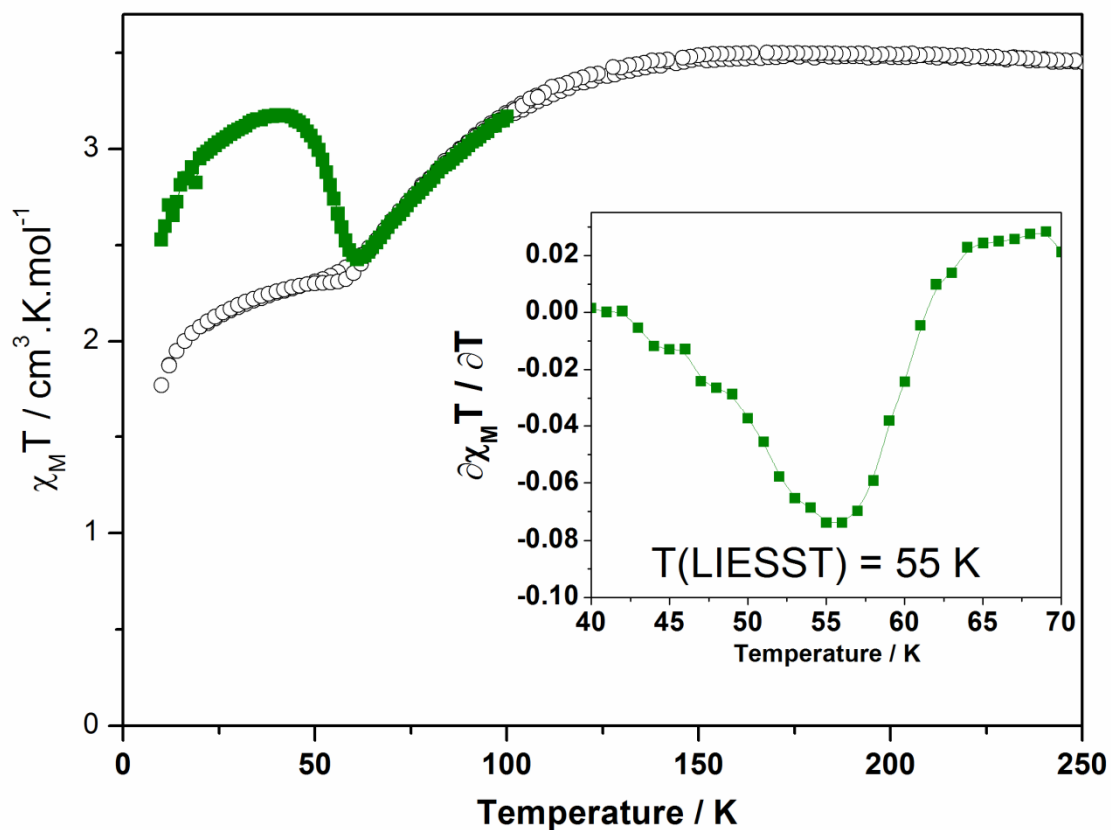

**Fig. S10** Thermal behaviour of the  $\chi_M T$  product of **5** before irradiation and in the dark after irradiation (■). The insert presents the derivative of the thermal  $\chi_M T$  as a function of  $T$  (in the dark after irradiation); the minimum allows the determination of the  $T(\text{LIESST})$  value

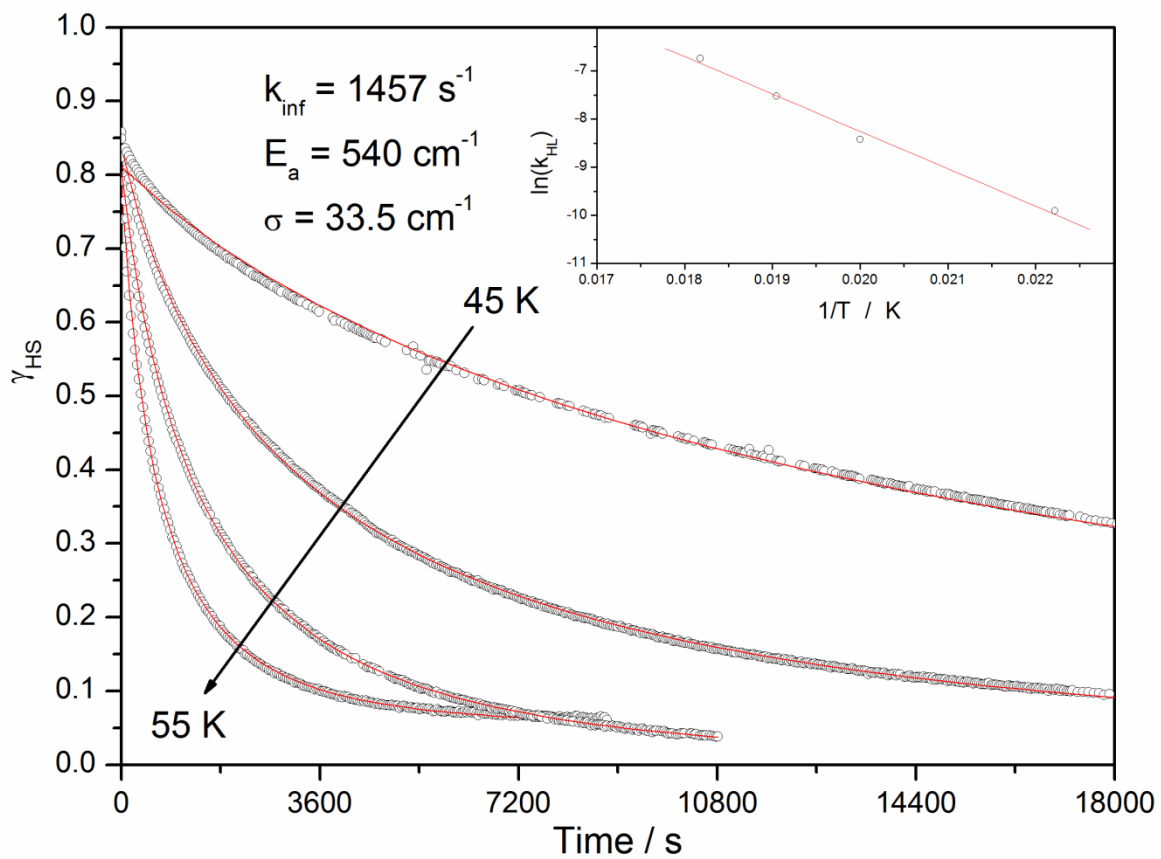

**Fig. S11.** Plot of the different relaxation kinetics recorded as a function of temperature (45-50 K) for **5**. The red lines are calculated using the parameters given in the text. The inset is the fit to the Arrhenius equation.



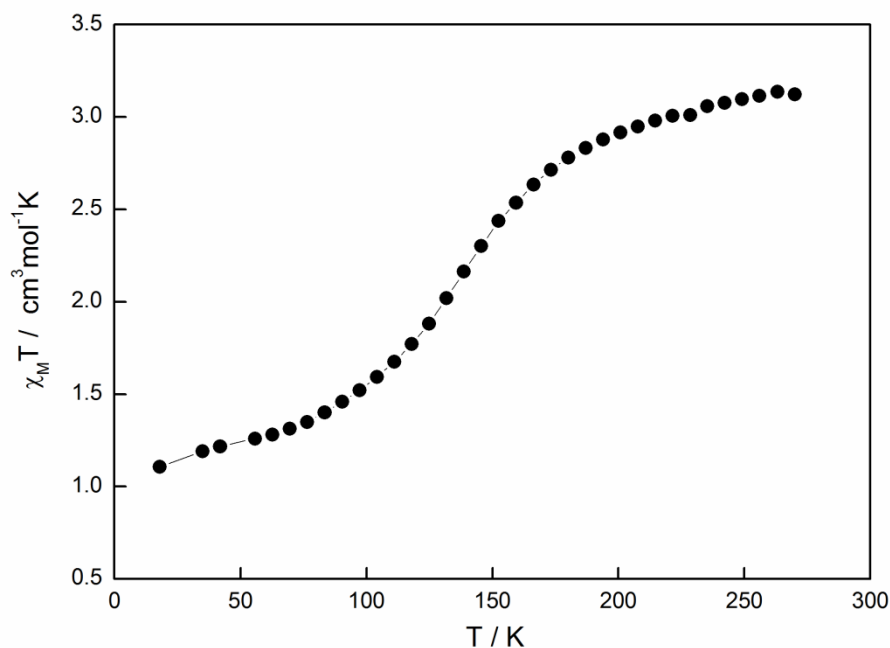

**Fig. S12** Plot of  $\chi_M T$  vs  $T$  for **7**, per Fe, in cooling and heating modes between 30-270 K in an applied field of 0.5 T.

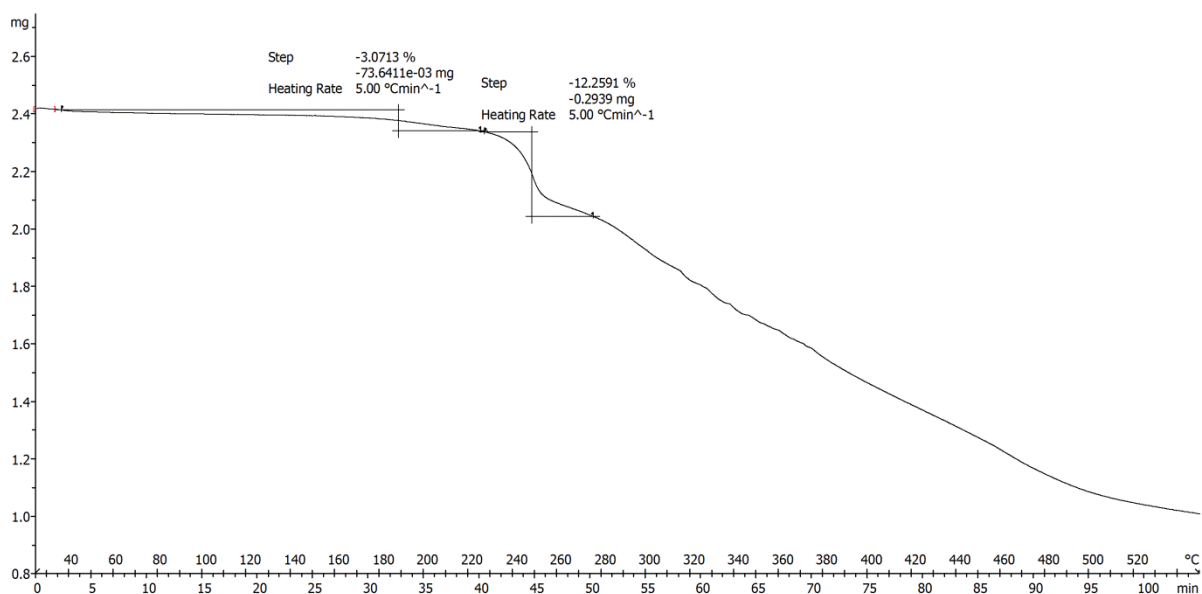

**Fig. S13** Thermogravimetric Analysis (TGA) of complex **3**·1.5H<sub>2</sub>O at a scan rate of 5 °C min<sup>-1</sup> revealing a gradual weight loss of *ca.* 3 % between 25 °C and 230 °C, an abrupt weight loss of *ca.* 12 % between 230 °C and 280 °C and a gradual weight loss after 280 °C due to complex decomposition.
